# Supplementary material for: MIF loss impairs Myc-induced lymphomagenesis
Source: Springer Nature journal article supplement (doi:10.1038/sj.cdd.4401653), 2005-06-10

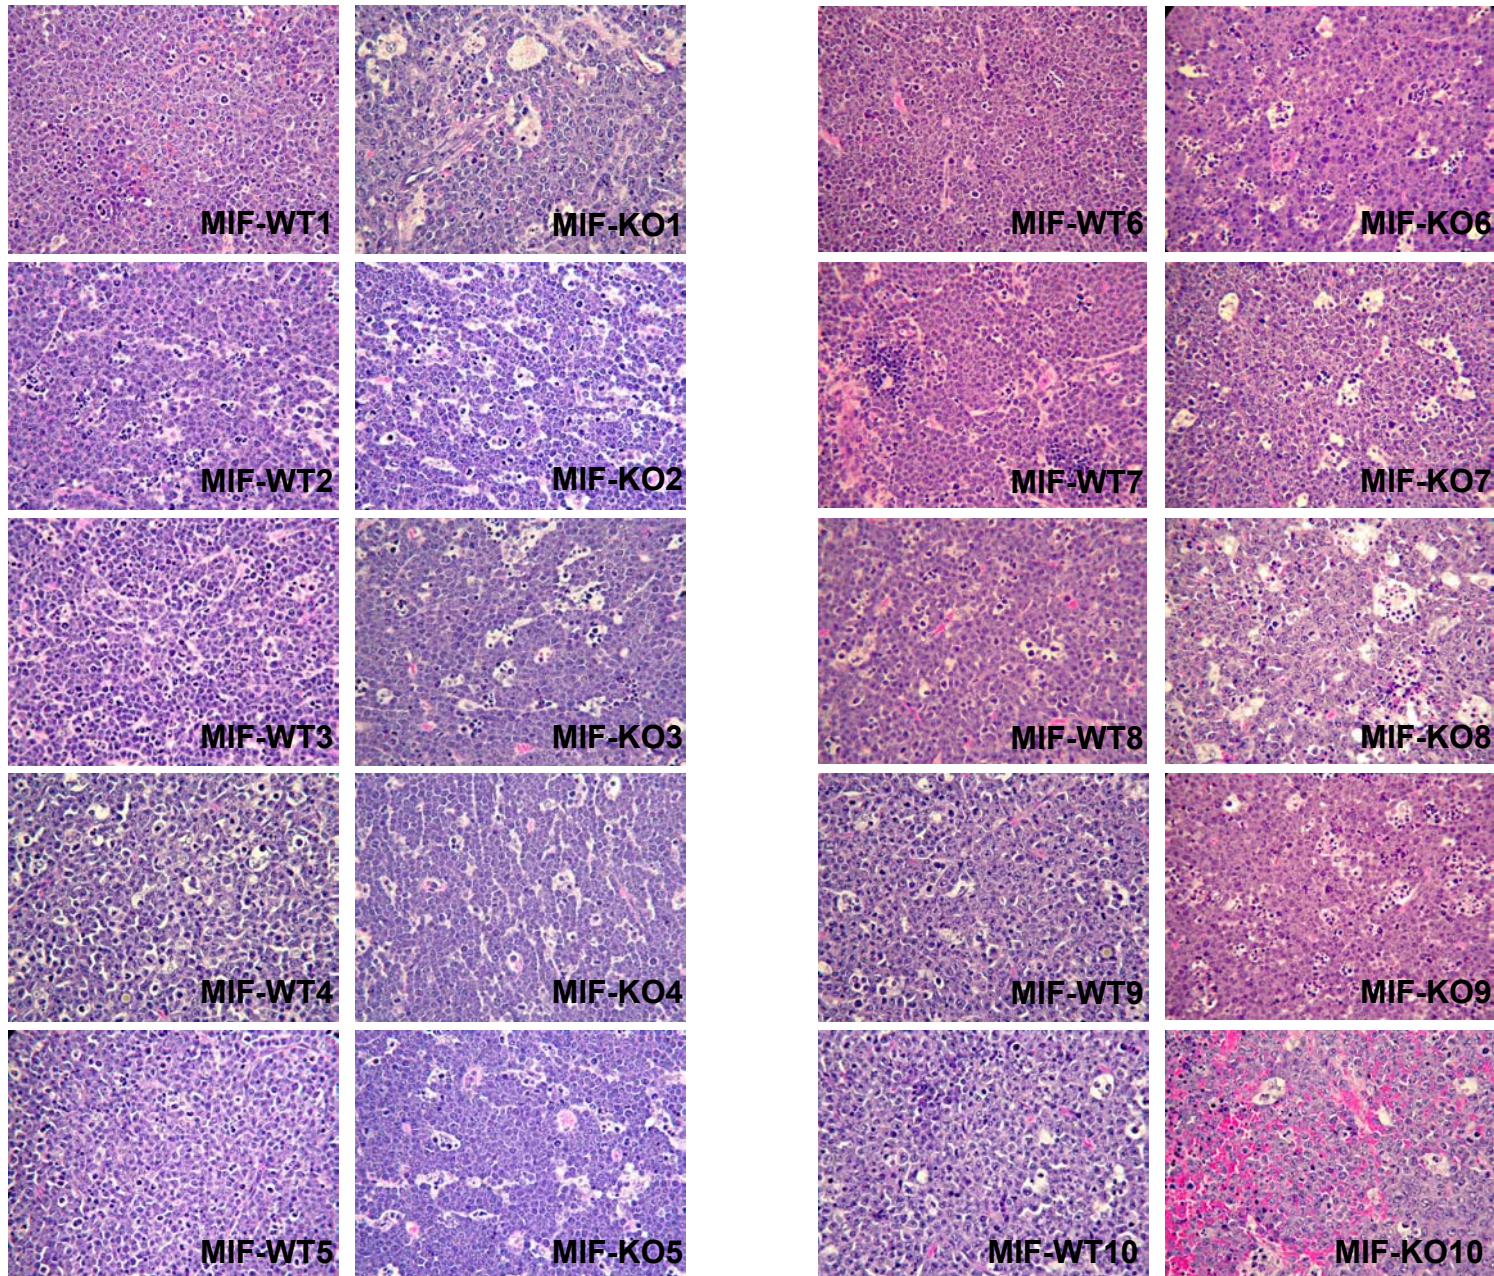

Suppl. Figure 1A



**B** MIF-WT E $\mu$ Myc tumor sections

Hoechst 33342

TUNEL

TUNEL

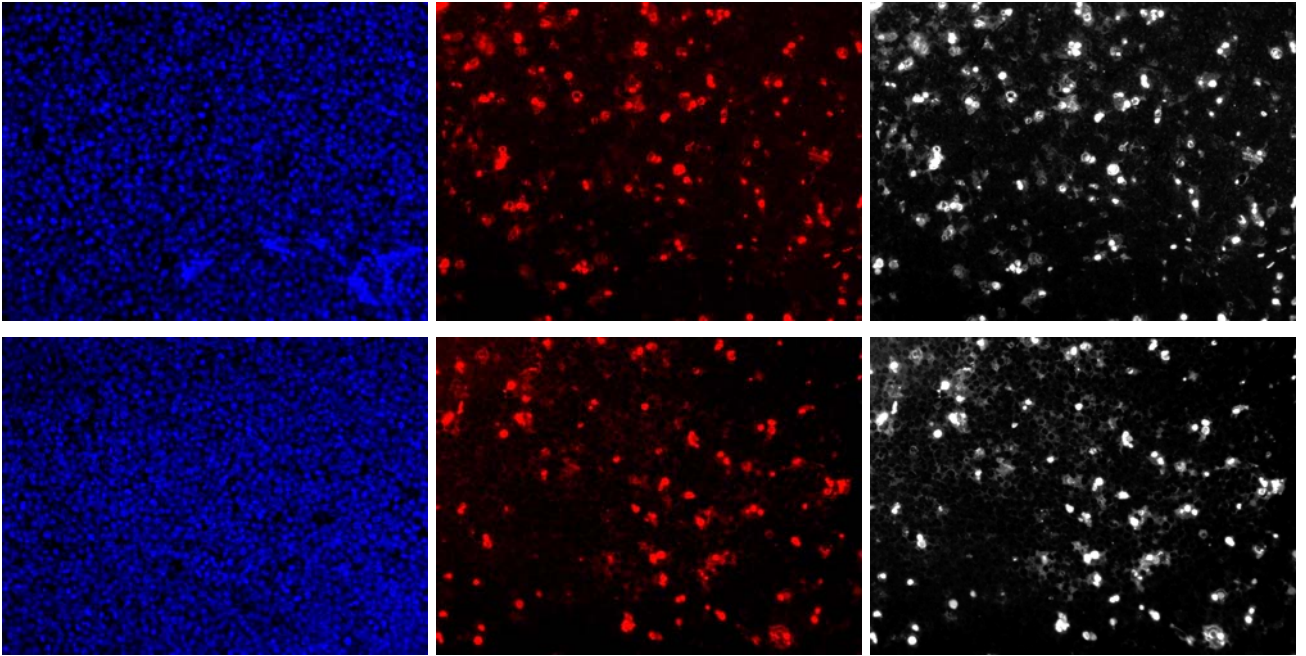

MIF-KO E $\mu$ Myc tumor sections

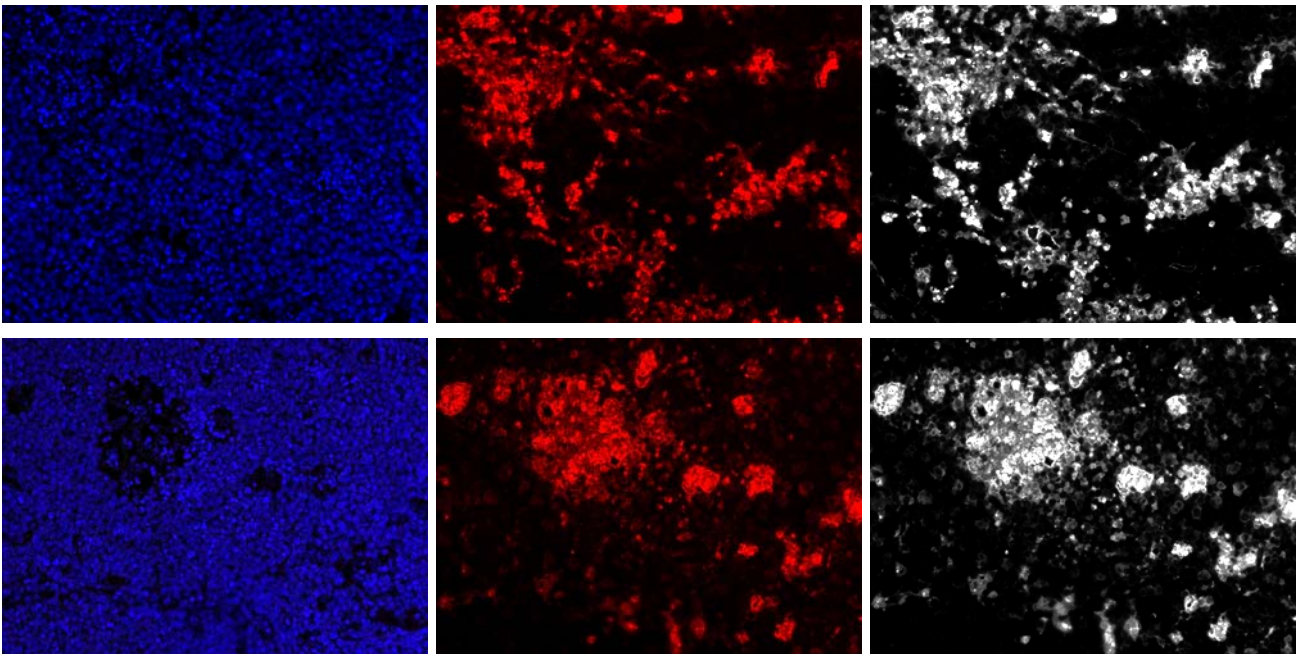

A bone marrow sections

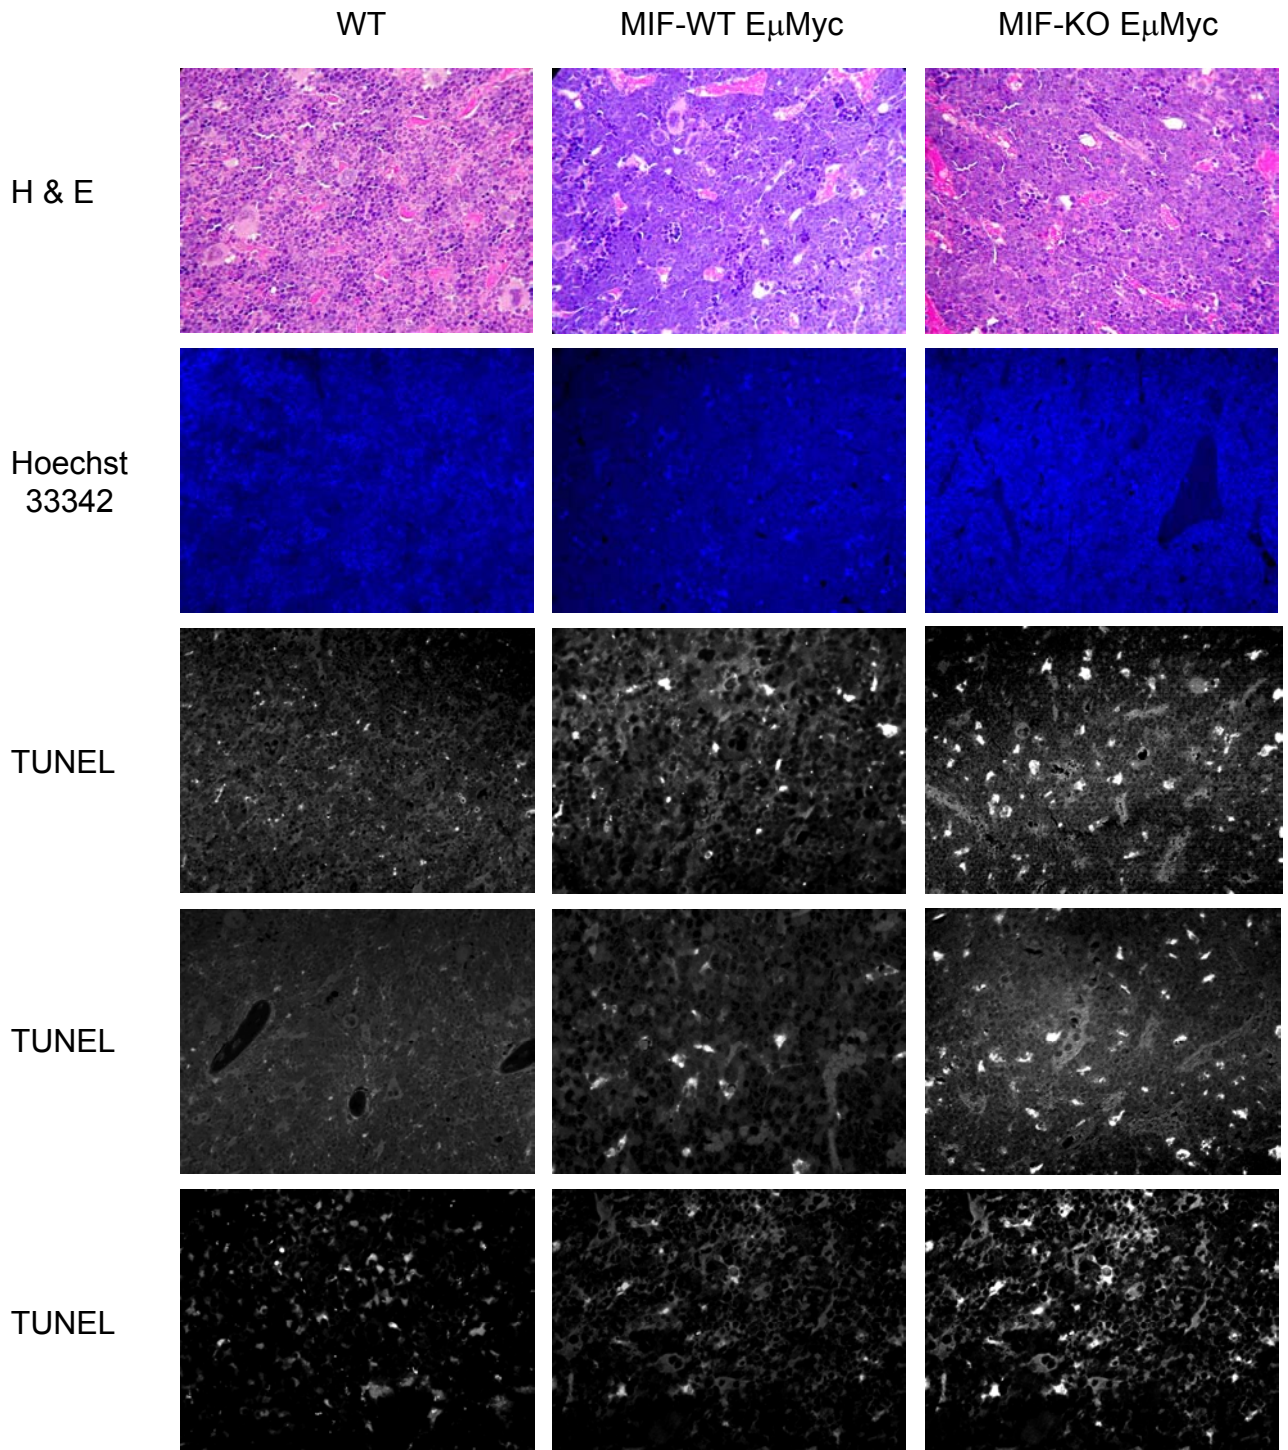



B

spleen sections

WT

MIF-WT E $\mu$ Myc

MIF-KO E $\mu$ Myc

H & E

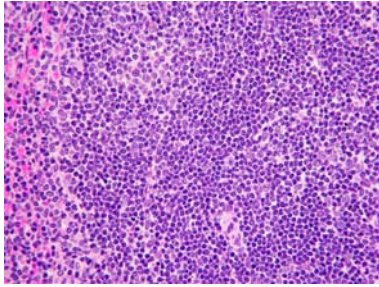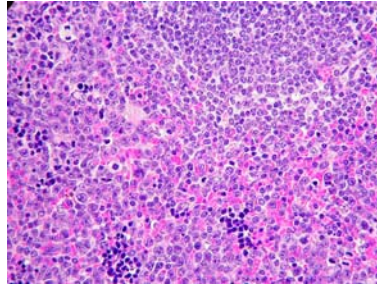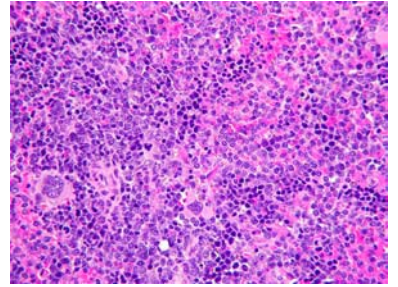

Hoechst  
33342

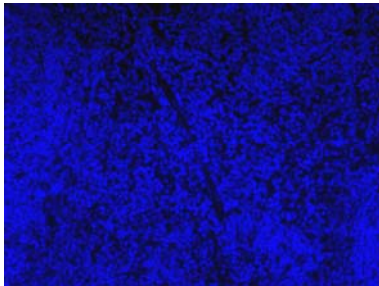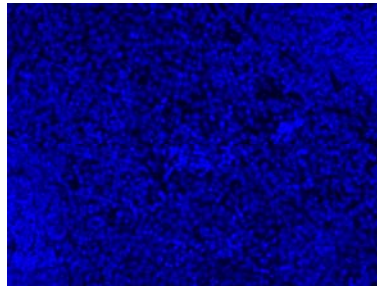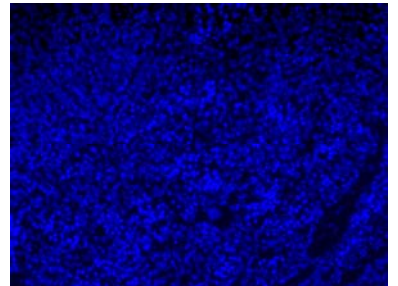

TUNEL

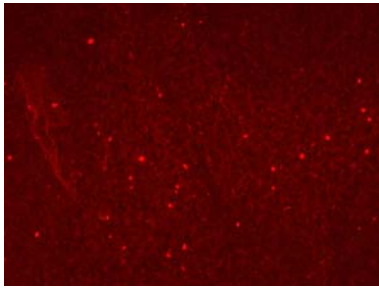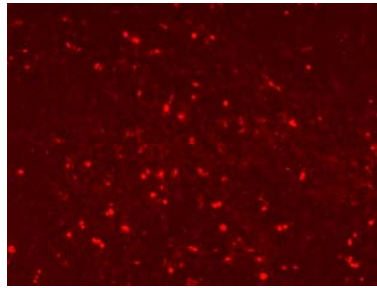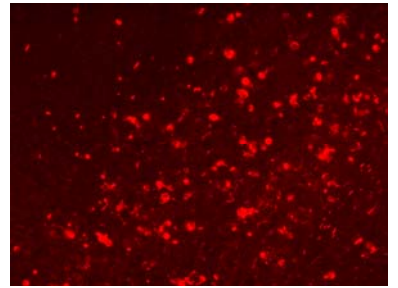

TUNEL

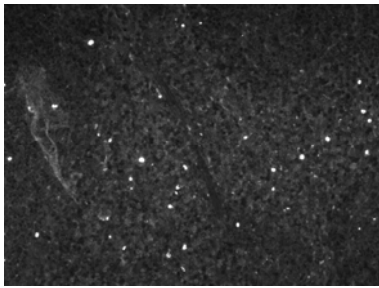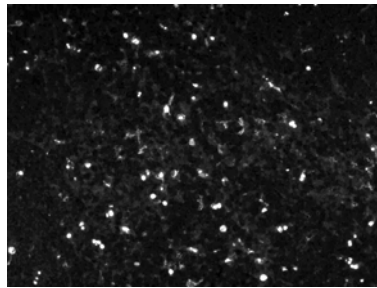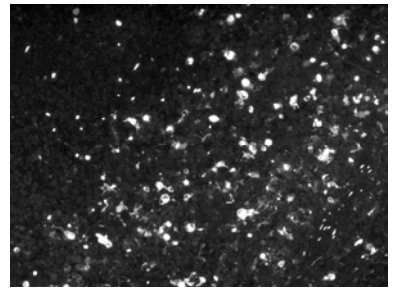

TUNEL

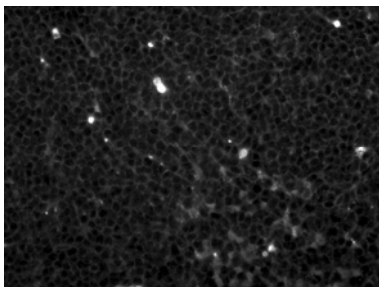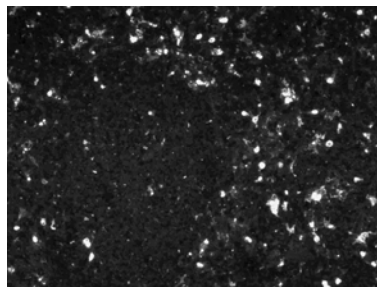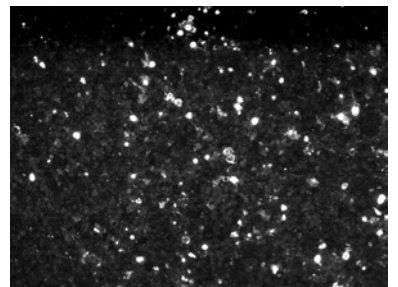

**A**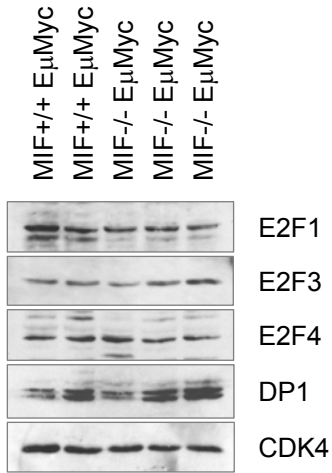**B**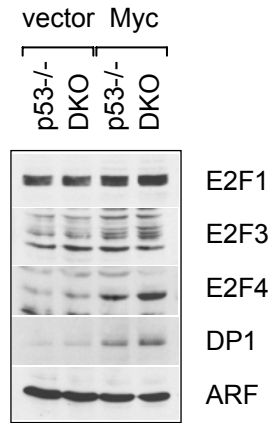**C**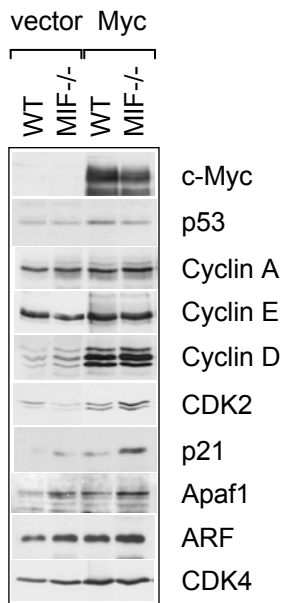**D**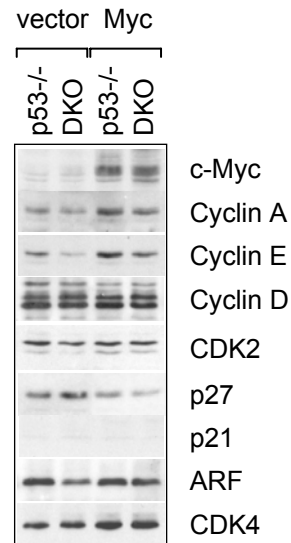

**A**MIF-KO E $\mu$ -Myc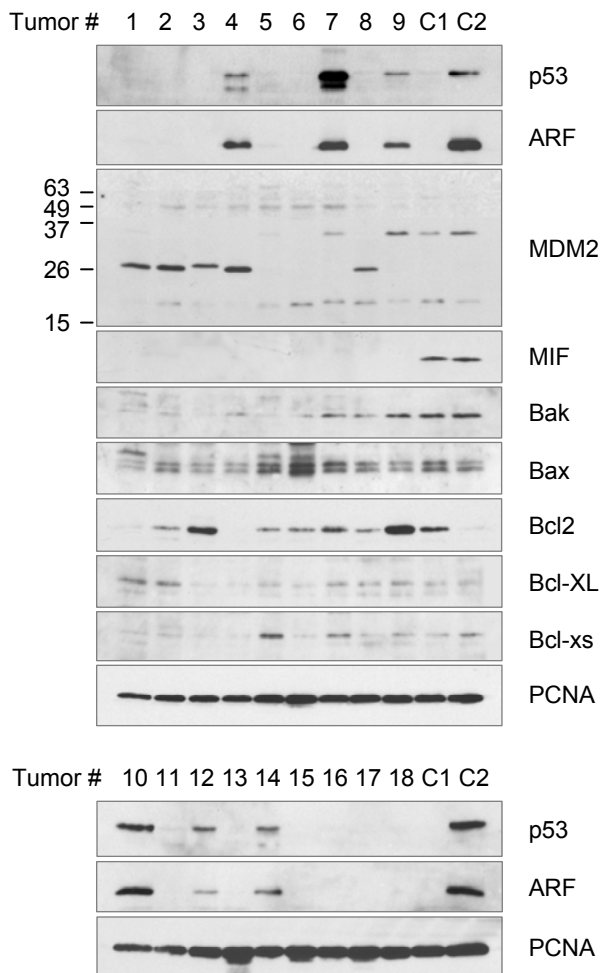**B**MIF-WT E $\mu$ -Myc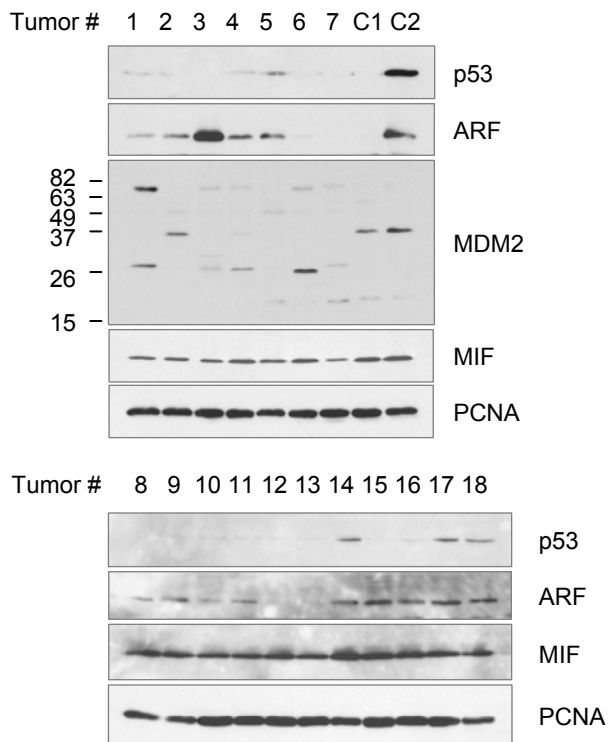**C**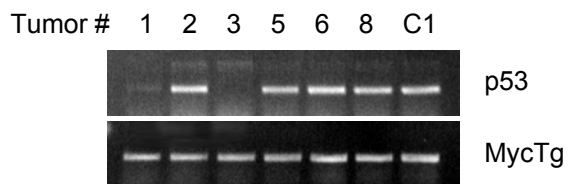

Supplement: 41418_2005_BF4401653_MOESM1_ESM.pdf [file 41418_2005_BF4401653_MOESM1_ESM.pdf]
